# Supplementary material for: Identification of amino acid residues in the ligand binding repeats of LDL receptor important for PCSK9 binding
Source: PubMed Central journal article supplement (PMC6399494; doi:10.1194/jlr.m089193), 2019-01-07
Supplement: 10.1194_M089193_jlr.M089193-1.pdf [file 10.1194_M089193_jlr.M089193-1.pdf]

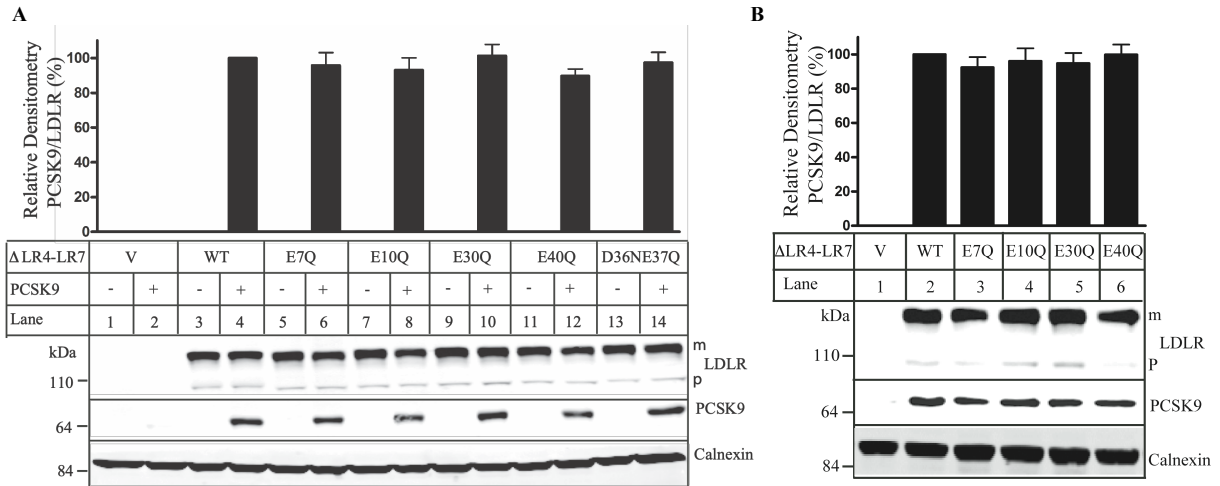

**Supplemental Figure S1. Binding of PCSK9 to the wild-type and mutant LDLR-ALR4-LR7 LDLR at pH 7.4 (A) or pH 6.0 (B).** The experiments were performed as described in the legend to Figure 1. LDLR and PCSK9 were detected by HL-1, and 15A6, respectively. Calnexin was detected by a polyclonal antibody. Top bands of LDLR were the mature and fully glycosylated forms (m). Bottom bands of LDLR were the precursor forms (p). Bottom figures were representative ones of protein levels. V: cells were transfected with the empty vector, pCDNA3.1. Data shown in top figures were quantified as described in the legend to Figure 1B. The percentage of the relative densitometry of PCSK9 binding to the wild-type LDLR was defined as 100%. Values were mean  $\pm$  S.D. of  $\geq 3$  experiments.
